# Supplementary material
Source: publisher figshare collection journal article supplement (https://tandf.figshare.com/ndownloader/files/13831532)
Supplement: Supplementary file 1 [file 13831532]

| Subgroup | Sex  (M/F) | Age (years) | Duration of diabetes (year) | BMI  (kg/m2) | Treatment |
| --- | --- | --- | --- | --- | --- |
| BG increase <7.8 mmol/L | 18/18 | 57±6 | 8.5±6.4 | 25.49±2.32 | BIAsp30 (n = 18)  BIAsp50 (n = 22) |
| BG increase ≥7.8 mmol/L | 15/29 | 65±5 | 9.4±7.9 | 25.18±2.61 | BIAsp30 (n = 22)  BIAsp50 (n = 18) |
| 2 hPBG <17.6 mmol/L | 17/21 | 56±7 | 8.3±5.8 | 25.67±2.13 | BIAsp30 (n = 24)  BIAsp50 (n = 16) |
| 2 hPBG ≥17.6 mmol/L | 16/26 | 66±4 | 9.8±6.6 | 25.09±2.80 | BIAsp30 (n = 16)  BIAsp50 (n = 24) |

**supplementary material**

**Table 1 Characteristics of subpopulations**

Data are shown as the mean±SD.Abbreviations: BG, blood glucose; 2hPBG, 2 h postprandial blood glucose; BMI, body mass index
